# Supplementary material for: Developmental models reveal the role of phenotypic plasticity in explaining genetic evolvability
Source: bioRxiv or medRxiv preprint supplement (doi:10.1101/2020.06.29.179226), 2020-07-01
Supplement: Supplementary file [file media-1.pdf]

## 1 **Supplementary Information:**

2

### 3 **Developmental models reveal the role of phenotypic plasticity in explaining** 4 **genetic evolvability**

5

6 Miguel Brun-Usan<sup>1,2\*</sup>, Alfredo Rago<sup>1,2</sup>, Christoph Thies<sup>1</sup>, Tobias Uller<sup>2</sup>, Richard A. Watson<sup>1</sup>

7

8 1- Institute for life sciences / Electronics and computer sciences. University of Southampton (UK)

9 2-Department of Biology, Lund University, 22362, Sweden.

10 \*- Corresponding author:

11 E-mail: miguel.brun-usan@biol.lu.se

12

13 **Correlations between maps.** A large ensemble ( $n=10^6$ ) of random GRNs was created by setting  
14  $N_g \sim U(1,24)$  and  $p(B_{ij} \neq 0) \sim U(0,1)$ , so that a variation in GRN size and connectivity were represented.  
15 The same ensemble was used for the three models. Model-specific elements were randomly drawn:  
16  $Z_{ij} \sim U(-1,1)$ ;  $D_i \sim U(0,1)$ . For each random GRN, parameter-to-phenotype maps were generated  
17 through systematic (parametric) perturbations in each of the GRN elements. The element perturbed  
18 was randomly chosen for each replicate ( $n=30$ ) and given values from 0 to 1 at 0.1 intervals (in this  
19 work, the input values of the different maps are of similar magnitude, an idealisation that allows us  
20 to compare the evolutionary properties of the different maps). During these perturbations, GRN  
21 topology was always held fixed. Perturbations in  $B_{ij}$  were conceptualised as genetic changes; in  $G_0$   
22 as changes in the initial conditions (i.e., parental effects); and in  $E_j$  or  $D_i$  as environmental changes  
23 (Fig. 1). That way, the systematic perturbation of each element generated 10 different phenotypes  
24 that were recorded in a two trait morphospace, constituting a map (GP map, PP map or EP map,  
25 respectively). Note that our “maps” are not maps in a formal mathematical sense because they do  
26 not retain the univocal relationship between the inputs and the outputs. However, they allow us to  
27 compare different phenotypic distributions whose inputs have different units and magnitudes.

28 We focus on two-trait phenotypes because they embody the minimal multivariate system  
29 where associations between traits can be found. These maps were compared, two by two, using two  
30 measures of map-to-map similarity. The first is a coarse-grained measure: Pearson’s  $r$  correlation  
31 between the two linear slopes in the phenotypic morphospace (Fig. 2). In order to take into account  
32 negative and close-to-zero slopes, the original slope values were transformed to  
33  $S_a = \text{sgn}(S) \cdot \text{Log}(1+S)$ , so that negative values correspond to negative slopes, and not to  $0 < S < 1$   
34 (therefore, the radially symmetric distribution of points around the origin (0,0) observed in in Fig.  
35 2A suggests that individual trait-trait correlations across maps have similar likelihood of being  
36 positive or negative). Two maps  $a$  and  $b$  were said to be correlated or uncorrelated depending on  
37 their sectorial position in this correlational ( $S_a, S_b$ ) space:  $\text{corr}(a,b) \leftrightarrow |\tan^{-1}(S_a/S_b) - \pi/4| \leq \pi/12$ ,

38  $\text{anticorr}(a,b) \leftrightarrow |\tan^{-1}(S_a/S_b) + \pi/4| \leq \pi/12$ , and not correlated otherwise (Fig. 2B). The second, fine-  
 39 grained measure is the Euclidean distance ( $ED_{a,b}$ ) between maps  $a$  and  $b$  (Fig. S3):

40

$$41 \quad ED_{a,b} = \sqrt{\sum_{j=1}^{10} (T_{aj1} - T_{bj1})^2 + (T_{aj2} - T_{bj2})^2} \quad (5)$$

42

43 where  $T_{ijk}$  is the value of trait  $k$  in the  $j^{\text{th}}$  phenotype of map  $i$ . As Fig. S3A shows,  $ED_{a,b} \propto |S_a/S_b|$ . As a  
 44 proxy for map complexity ( $C_a$ ) we use the sum of the squared residuals of each map with respect to  
 45 its linear regression: the more a map departs from a perfect line the more complex it is:

46

$$47 \quad C_a = \sum_{i=1}^{10} (T_{i2} - T_{i1} S_a)^2 \quad (6)$$

48

49 where  $T_{ij}$  is the value of the trait  $j$  of the  $i^{\text{th}}$  point (phenotype) of the map considered. For this  
 50 analysis maps were re-scaled to ( $0 < T_{ij} < 1$ ) values in order to avoid size-effects on the map  
 51 complexity (otherwise the squared residuals of maps with large phenotypic values would result in  
 52 artefactually higher complexity) (Fig. S3B). We assess the effect on map-map similarity (slopes and  
 53 map complexities) of GRN size ( $N_g$ ) and connectivity  $p(B_{ij} \neq 0)$  (Fig. S4), but not of GRN topology  
 54 itself as this is beyond the scope of this work (for a discussion on this see Salazar-Ciudad et al. 2000  
 55 and Jimenez et al. 2015).

56

57 **Control experiments.** Two control experiments were set up to better understand the causes of the  
 58 observed correlations between slopes  $S$  and map complexities  $C$ . In the first, with a probability  
 59  $p = \{0.1, 0.2, \dots, 1\}$ , GRN topology was changed as  $M_{ij} \rightarrow |M_{ij} - 1|$  and the GRN input values as  
 60  $x \rightarrow x \sim U(0,1)$ . Then, correlations were recorded between the maps arising from the unperturbed  
 61 GRN ( $S$  and  $C$ ) and the randomized ones ( $S^*$  and  $C^*$ , Fig. S4). In the second control experiment, we  
 62 used a set of randomly generated mathematical functions (polynomials  $f(x)$  with known degree  
 63  $\text{deg}(f) \leq 4$ ) as a null, non-generative space in which we could test whether the observed correlations  
 64 between map complexities are a general property of any mathematical function rather than a  
 65 biologically relevant phenomenon (argument and value of  $f(x)$  are considered to correspond to the  
 66 traits  $T_1$  and  $T_2$ ). A discrete “mapping” was created by assigning ten values to  $x = \{0.1, 0.2, \dots, 1\}$ , and  
 67 then calculating the corresponding  $y$ -values (Fig. S5):

68

$$69 \quad y(\approx T_2) = \sum_{i=0}^4 R_{(i)} x(\approx T_1)^i e^{-i} \quad (7)$$

70

71 where  $R$  is a vector of random numbers  $R(i) \sim U(0,1)$  and  $e^{-i}$  a corrective token that devalues the  
 72 high-degree terms of the function, ensuring that polynomials of different degrees are equally  
 73 represented. If necessary,  $y$ -values were rescaled to  $(0 < y < 1)$ , as in Fig. S3B), so that the map  
 74 complexity of the the function was measured under the same conditions as for GRNs.

75

76 **Evolving maps.** Several of our experiments involve the adaptive evolution of a map: a population  
 77 of  $p(=64)$  haploid individuals picked from the random ensemble evolves in a mutation-selection-  
 78 drift scenario until a map with a target slope  $S^T$  is encountered, or until a maximum number of  
 79  $t_{max}=10^5$  generations is reached. Arbitrarily,  $S^T$  is set to  $S^T=1$  (other choices do not alter the results,  
 80 see Fig. S6). With a rate of 0.05 ( $=1/N_{gmax}$ ) per element and generation, point mutations are  
 81 introduced in the matrices encoding the topology and interaction strengths of the GRN:  $B_{ij} \rightarrow B_{ij} + \xi$   
 82 ( $\xi \sim N(\mu, \sigma)$ ;  $\mu=0$ ,  $\sigma=0.01$ ) and  $M_{ij} \rightarrow |M_{ij}-1|$ . The fitness of each individual  $W_i$  is calculated on the  
 83 basis of its ability to create a map similar to the target one (not on the basis of a single phenotype).  
 84 Thus, each individual in each generation is exposed to 10 different inputs in one of its GRN  
 85 elements (the element depends on the map being evolved), and its slope  $S_i$  in a  $T_1$ - $T_2$  morphospace  
 86 recorded and compared to the target slope  $S^T$ . This algorithm is formally equivalent to an inter-  
 87 generational variation in the inputs (De Jong 1995). The similarity with the target slope determines  
 88 the individual's fitness and, in turn, the probability of each individual to contribute to the next  
 89 generation:

90

$$91 \quad W_i = e^{-|S_i - S^T|} \quad (8)$$

92

93 Some of our experiments involve different levels of selective grain on the maps, which has two  
 94 different components: intra-generational (i.e., how many different inputs (or points of the whole  
 95 map) can the population experience in a single generation) and inter-generational (i.e., how often  
 96 these inputs change, which can be conveniently expressed as the number of generations between  
 97 changes in the input values). For the sake of simplicity we collapse these two components in a  
 98 single composite measure of fine-grainedness as inputs/generation (Fig. 5, Fig. S7 and Fig. S8).  
 99 Since slopes alone cannot account for the number of points in a map, the fitness is now calculated  
 100 as:

101

$$102 \quad W_i = e^{-ED_{map_i, map^T}} \quad (9)$$

103

104 where  $ED_{map_i, map^T}$  is the Euclidean distance, point by point, between the individual's map ( $map_i$ ) and  
 105 the target map ( $map^T$ ), as described in Eq. (5).

106 **Supplementary Figures:**

107  
108  
109  
110  
111  
112  
113  
114  
115  
116  
117  
118  
119  
120  
121

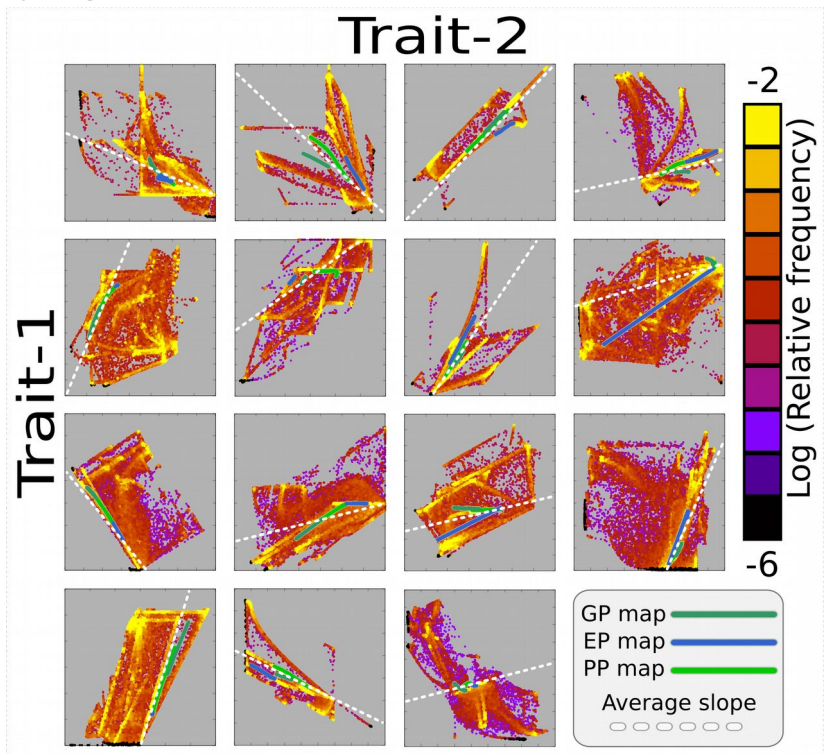

122 **Figure S1. General Phenotypic Distributions (GPDs).** A general phenotypic distribution (GPD) is the total  
123 amount of phenotypic variation that a given developmental mechanism (with a fixed GRN topology) can  
124 produce under systematic variations of all their phenotypic determinants (i.e. genetic, parental and  
125 environmental perturbations). The concept of GPD explicitly expands the previously proposed concept of  
126 “variational properties” (See Ref. 24) in order to incorporate parental variation. This figure shows 15  
127 different GPDs, each one corresponding to a different but representative GRN of our random ensemble. For  
128 each one, instead of varying one single GRN element at a time using ten pre-established values (0 to 1 at 0.1  
129 intervals), we vary all of them simultaneously and in a more continuous manner (100 random values  $0 < x < 1$ ).  
130 That is, instead of  $n=30$  phenotypes (10 genetic+10 parental+10 environmental perturbations), we get  $n=10^6$   
131 (100x100x100) potential perturbations (and phenotypes) per GRN. Each point in these panels corresponds to  
132 one of these  $10^6$  potential phenotypes in a  $T_1$ - $T_2$  morphospace (scaled to fit the the minimum and maximum  
133  $T_1$ - $T_2$  values of the GPD). The colour represents the density of points: regions with high density (calculated  
134 on the basis of a 100x100 grid) are coloured in yellow, and regions with rare phenotypes are coloured in  
135 purple. Notice that the GPD has two levels of structure: One is the set of developmentally possible  
136 phenotypes (the occupied area of the morphospace), which as the panels show, is often discontinuous and  
137 non-isotropic. The other is the different likelihood of the different phenotypes within this region (specially  
138 the most probable phenotypes exemplified by the yellowish regions and ridges). This two-level structure of  
139 the GPD suggests that development creates correlations between the maps (green and blue lines) because the  
140 maps most likely contain phenotypes belonging to the ridges of maximal phenotypic probability (which are  
141 often parallel or sub-parallel). Dashed white lines are the average slope of the GP, EP and PP maps (dark  
142 green blue and light green lines, respectively). GRN + Multilinear model.

143  
144  
145  
146  
147  
148  
149  
150  
151  
152  
153  
154  
155  
156  
157

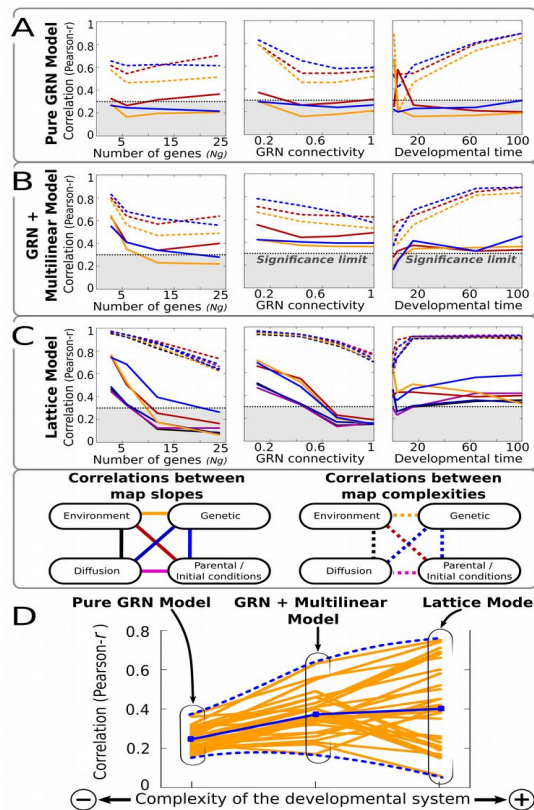

158 **Figure S2. Map-to-map correlation are robust across the different models considered.** A large ensemble  
159 ( $n=10^6$ ) of random developmental mechanisms was generated by creating a random GRN (as in Fig. 2, see  
160 S11) and by assigning random values ( $U \sim (0,1)$ ) to the remaining model-specific parameters (see Methods).  
161 For each of these mechanisms, systematic parametric variations were introduced to each of the GRN  
162 elements (genetic, initial conditions, environmental inputs). In the case of the lattice model, variation was  
163 also introduced in the diffusion rates  $D$ . Each perturbation on an element generates a collection of  
164 phenotypes (a map) in a two-trait morphospace, characterised by a linear slope  $S$  and a map complexity  $C$ .  
165 The panels show the correlations (Pearson's  $r$ ) between pairs of slopes (solid lines) and pairs of map  
166 complexities (dashed lines) for the three models considered: the pure GRN Model (A), the GRN +  
167 Multilinear model (B) and the lattice model (C). The schemas below panel (C) assigns a specific colour to  
168 each map-map pair (notice that the three models are readily comparable because they map onto the same  
169 two-trait morphospace and have similar ranges in the parametric variation). For each model, the randomly  
170 generated mechanisms have been sorted according to their number of genes ( $N_g$ ) and GRN connectivity  
171 (proportion of non-zero elements in the matrix  $B$ ), to see how these topological features affect the map-to-  
172 map correlations (left and central panels). In addition, for each mechanism the correlations have been  
173 recorded over a different number of developmental iterations (right panels). Overall, this figure shows that  
174 Pearson correlations are significant ( $r > 0.3$ ) across the different models considered and under different  
175 topological and developmental constraints. (D) Since the different mechanisms bear the same ( $n=10^6$ ) GRNs,  
176 we assess the effect of an increased model complexity in the correlations. Yellow lines show how adding  
177 extra layers of complexity (e.g., a multi-linear layer or multicell reaction-diffusion processes) to a basic GRN  
178 affects the map-to-map correlations.

179  
180  
181  
182  
183  
184  
185  
186  
187  
188  
189  
190  
191  
192  
193

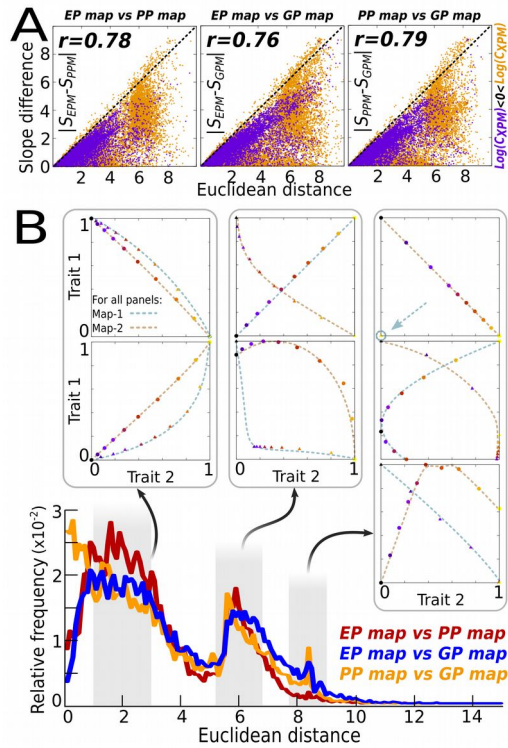

194 **Figure S3. Correlation between maps is robust when using fine-grained measures of phenotypic**  
 195 **distances.** In addition to slope correlation (a coarse-grained measure of phenotypic distances) between maps,  
 196 we have also measured map-to-map similarity using the euclidean distances ( $ED$ ) between them (a fine-  
 197 grained measure of phenotypic distances that takes into account distances between pairs of individual  
 198 phenotypes). (A)  $ED$  between paired maps for each GRN in our random ensemble are compared with the  
 199 slope similarity (absolute value of slope differences) between maps. We proceed that way because there is  
 200 not an *a priori* null expectation about which would be the minimum  $ED$  value above which the similarity  
 201 would be significant. The three panels show that slope similarity strongly correlates (Pearson's  $r \gg 0.3$ ) with  
 202 the Euclidean distance between any pair of maps. This implies that the former coarse-grained measure can be  
 203 confidently used as a proxy of map similarity, as it has been extensively used in most plots. In addition, we  
 204 have detected that complex parameter-to-phenotype maps ( $\text{Log}(C) > 0$ ), yellowish dots) have a much noisier  
 205 relationship between slope differences and euclidean phenotypic distances ( $ED$ s) than simpler maps  
 206 ( $\text{Log}(C) < 0$ ), purple dots). This is probably due to the fact that, although complex maps tend to have larger  
 207  $ED$ s between them, their linear slopes tend to be small, which explains the great scattering of yellow dots  
 208 below the diagonal. (B) The whole random ensemble is analysed now in terms of  $ED$ s alone. The frequency  
 209 plot shows a skewed multimodal distribution where the majority of maps have moderate  $ED$ s  $\approx 2$  between  
 210 them. This correspond to cases where both maps being compared show relatively simple, monotonic and  
 211 smooth trait covariation (see example maps above in a normalized  $T_1$ - $T_2$  space). A second peak in frequency  
 212 happens around  $ED$ s  $\approx 6$  account for the maps that, although still showing monotonic trait covariation (see  
 213 above), exhibit flipped slopes (a situation that is statistically more common than no-correlated maps, see Fig.  
 214 2B). This third peak ( $ED$ s  $\approx 8.5$ ) contains either highly non-linear maps or pairs of maps where one them  
 215 shows no parametric sensitivity (a point in the  $T_1$ - $T_2$  space, see top right panel). This third peak roughly  
 216 corresponds to the bulk of yellow off-diagonal points shown in (A).  $n=10^6$ . GRN + Multilinear model.

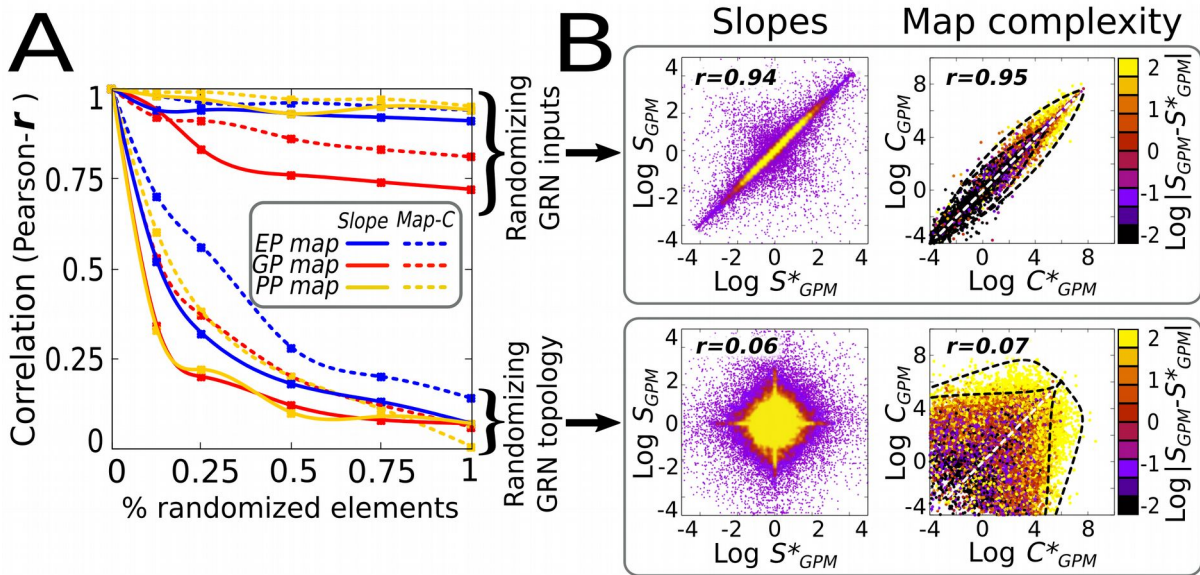

218 **Figure S4. GRN topology as the main contributor to phenotypic correlations.** The figure summarizes a  
 219 stability test aimed to better understand the causal origins of the map-to-map correlations observed in Fig. 2  
 220 (specifically, if correlations arose from the developmental mechanism itself or from similarities on the input  
 221 parameter values). In order to discriminate between these two causal factors, we gradually randomize both  
 222 (with a probability  $p=\{0.1,0.2,\dots,1\}$ , the GRN topology was changed as  $M_{ij} \rightarrow |M_{ij}-1|$  and the GRN input  
 223 parameters as  $x \rightarrow x \sim U(0,1)$ ) while recording if the correlations between maps were still retained or not.  
 224 Notice that in here correlations are established between maps arising from the unperturbed (elemental) GRN  
 225 (slopes  $S$  and map complexities  $C$ ) and the perturbed, randomized ones ( $S^*$  and  $C^*$ ). (A) For every GRN in  
 226 our random ensemble, correlations are robust against input randomization but fall dramatically to non-  
 227 significant values ( $r < 0.3$ ) when the GRN topology is allowed to change parametrically. The observed pattern  
 228 is very similar for both slopes (solid lines) and map complexities (dashed lines). This insensitivity to the  
 229 randomization in the input values (see SI1) suggests that they are not causally involved in the correlations  
 230 observed in Fig. 2A. On the contrary, correlations rather show a strong dependence with the GRN topology,  
 231 which embodies the dynamical developmental system that creates the phenotypes. (B) Each point plotted in  
 232 (A) represents a correlation measured in a two-dimensional spaces for slopes  $S$  or map complexities  $C$  (As in  
 233 Fig. 2A). We provide, as an illustrative example, two of these spaces corresponding to maps which arise  
 234 from genetic perturbations (spaces for other types of perturbations are very similar, Fig. 2A). In the upper  
 235 row, all the maps emerging from a set of genetic inputs  $x=\{0,0.1,0.2,\dots,1.0\}$  are compared with those  
 236 emerging from maximally randomized genetic inputs  $x \sim U(0,2)$ . The limited scattering suggests that a given  
 237 GRN produces almost identical GP maps irrespective of the inputs used. Below, using the same set of  
 238 genetic inputs  $x=\{0,0.1,0.2,\dots,1.0\}$  and the same GRN ensemble, maps emerging from elemental GRNs and  
 239 from perturbed GRNs whose topologies have been fully randomized ( $M_{ij} \rightarrow |M_{ij}-1| \forall M_{ij}$ ) are compared,  
 240 showing that, despite having identical inputs, they produce totally unrelated phenotypes.  $r$  stands for  
 241 Pearson's correlation. Yellow areas in  $S_{GPM}$  vs  $S^*_{GPM}$  spaces (left plots in B) contain 90% of GRNs.  $n=10^6$ .  
 242 GRN + Multilinear model.

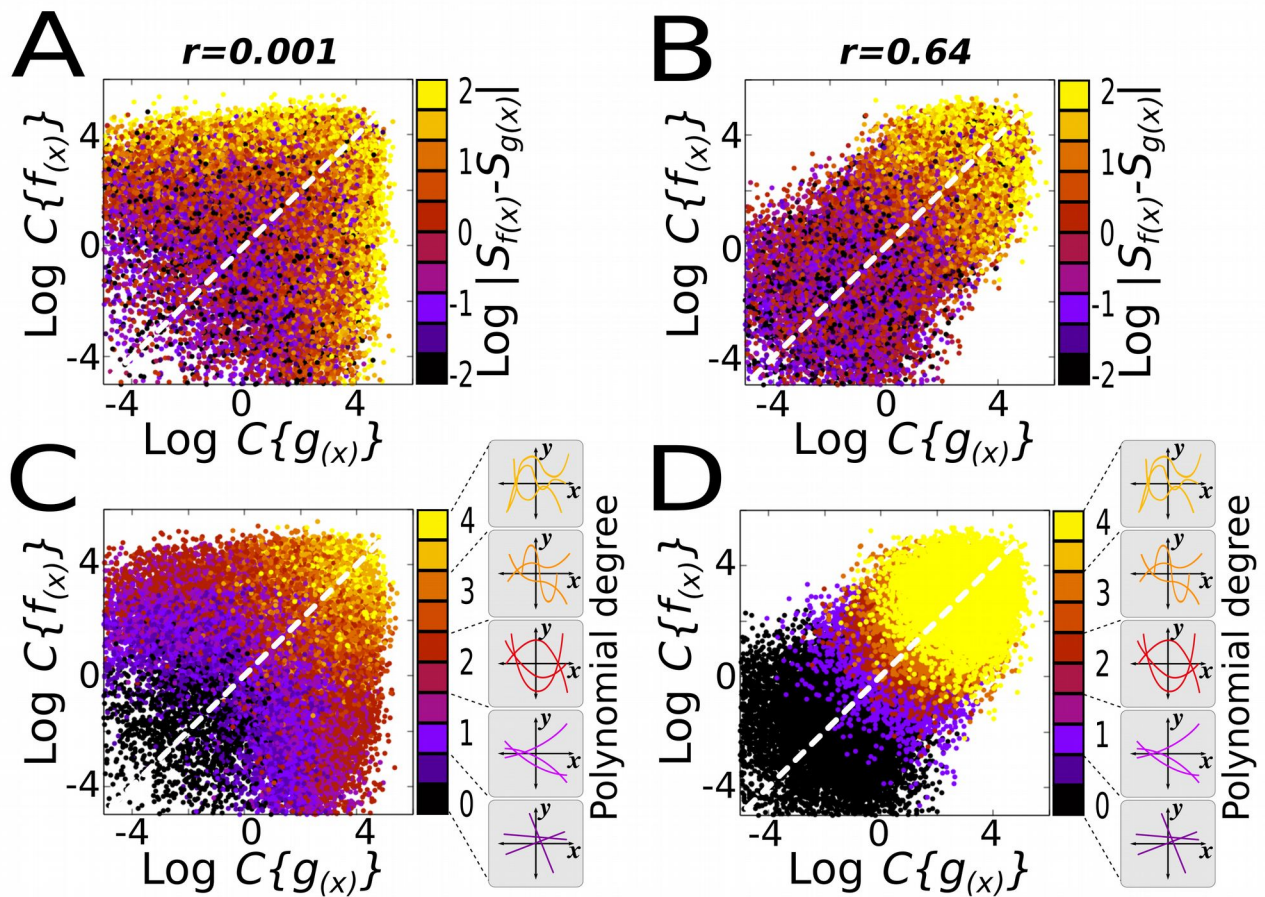

245 **Figure S5. Geometry alone does not explain the observed positive correlation between map**  
 246 **complexities.** The aim of this experiment is to assess whether the observed correlation between map  
 247 complexities (Fig. 2C) is a general feature mathematical functions or not. In order to do this, we analysed  
 248 the relationship between function complexities (measured the same way as map complexity  $C$ , see SI1) in a  
 249 large ensemble of random polynomial equations of known degree ( $\text{deg}(f) \leq 4$ ), where the  $x, y$  variables of  $f(x)$   
 250 are considered to correspond to the  $T_1$  and  $T_2$  traits (see SI1). (A) When two functions  $f(x)$  and  $g(x)$  are  
 251 randomly picked from the ensemble, no correlation between their map-complexities is observed. Colours  
 252 express absolute differences between slopes (As in Fig. 2C). (B) A positive correlation between map  
 253 complexities only appears when the functions to be compared are first sorted according to their complexity  
 254 class, that is when  $\text{deg}(g(x)) := \text{deg}(f(x))$ . (C) The same as A, but colours now represent differences on the  
 255 degree of the functions ( $|\text{deg}(f(x)) - \text{deg}(g(x))|$ ) rather than differences between slopes. (D) The same as A, but  
 256 colours now denote the degree of the functions  $\text{deg}(f(x))$  (since functions have been previously sorted, it is  
 257 the same as  $\text{deg}(g(x))$ ). Notice than in B and D, the correlation only appears as an inter-class effect simply  
 258 because the function complexity correlates with the degree of that function ( $\text{deg}(f(x)) \propto C\{f(x)\}$ ), but it is absent  
 259 within the same class functions. This suggests that development creates correlations between the map  
 260 complexities by restricting the number of developmental outcomes to well-defined and mechanism-specific  
 261 possible general phenotypic distributions (GPDs, Fig. S1).  $n=10^6$ .



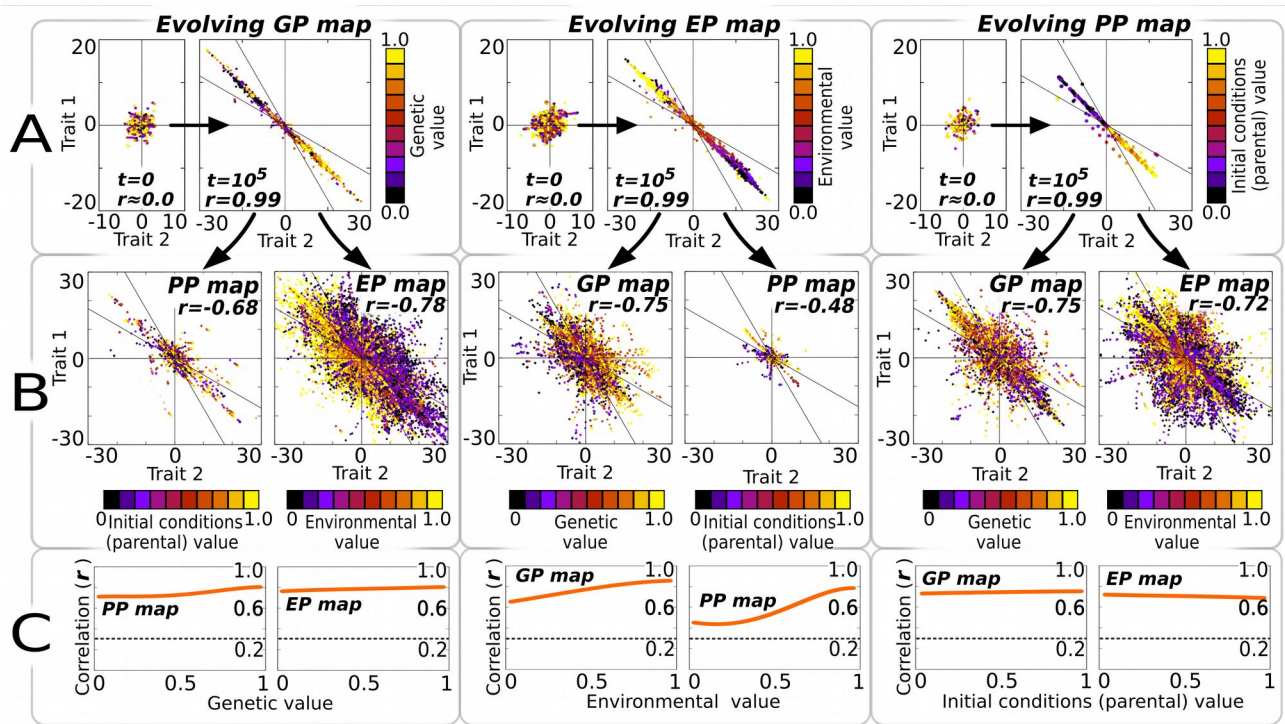

264 **Figure S6. Using negative slopes (anti-correlated traits) as a target does not change the general results**  
 265 **of map evolution.** This figure reproduces the same results of Fig. 3, but in this case a target map with a  
 266 slope  $S_x = -1$  (instead of  $S_x = 1$ ) has been used in the simulations. A comparison between both figures clearly  
 267 reveals that results of the experiments involving adaptive evolution of maps are very similar when using  
 268 different (linear) targets. As in Fig. 3, a population whose individuals initially exhibit no particular  
 269 phenotypic distribution in  $t=0$  (A, small panels) is evolved to fit a target phenotypic distribution using as an  
 270 input just one kind of phenotypic determinant. In each generation, one individual is exposed to 10 different  
 271 values ( $0 < x < 1$ ) of this phenotypic determinant, thus producing a set of ten potential phenotypes whose slope  
 272 in a  $T_1$ - $T_2$  space is compared with the target to evaluate the individual's fitness  $W_i$ , see SI1). After  $10^5$   
 273 generations in a mutation-selection-drift scenario (where other sources of phenotypic variation are frozen),  
 274 population has a narrow phenotypic distribution in the evolved map (A, big panels). Then, we uncover the  
 275 hidden variation in the other maps by i) freezing the variation in the parameter that generated the evolved  
 276 map to an intermediate value and ii) introducing parametric variation ( $0 < x < 1$ ) in the other phenotypic  
 277 determinants (those that were kept fixed during the evolutionary trial). (B) Results reveal that evolving a  
 278 single map adaptively creates significant side-effect phenotypic distributions in the other maps that are not  
 279 the target of natural selection. (C) Correlations in the side-effect maps are significant irrespective of the  
 280 value at which the parameter of the evolved map is frozen.  $p=64$  individuals ;  $n=30$  replicates. GRN +  
 281 multilinear model.

282

283

284

285

286

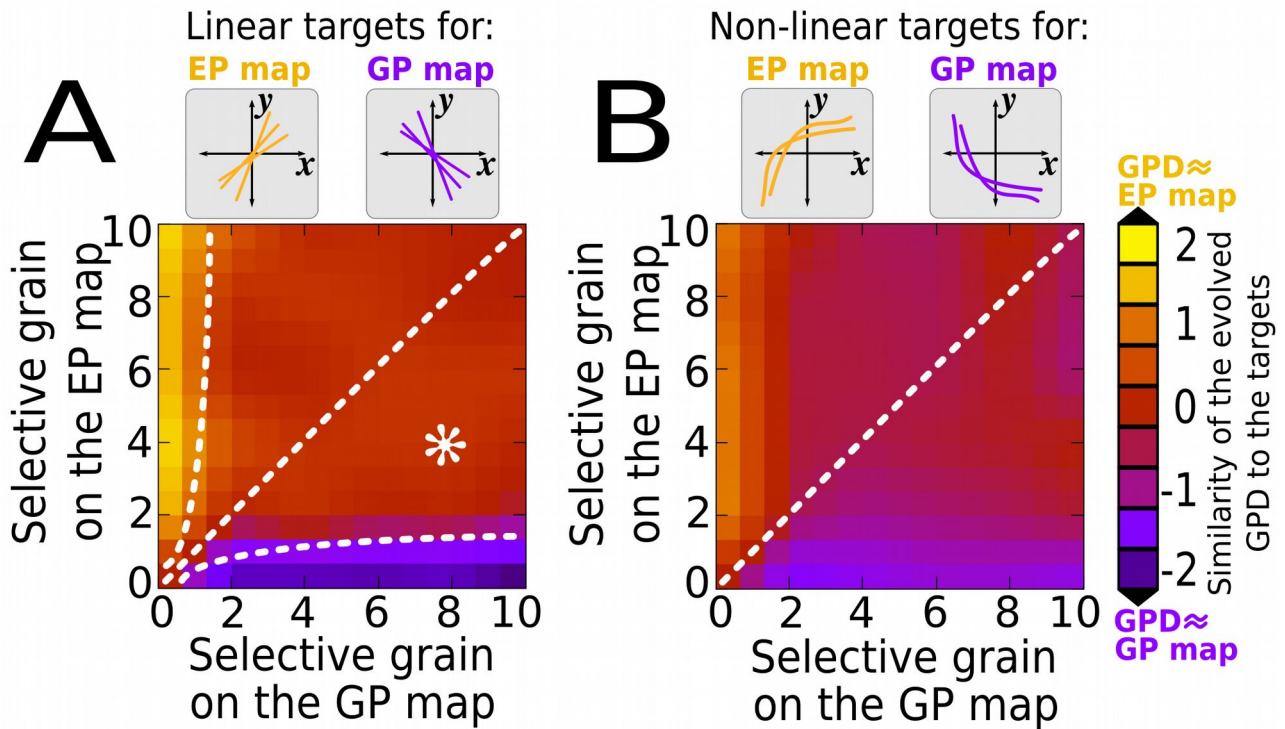

288 **Figure S7. The structure of the GPD is determined by the map under more fine-grained selection.** For  
 289 this experiment, two different maps (EP map and GP map), each one having a different selective grain, are  
 290 simultaneously evolved. (A) In order to discriminate between the effects of selection on the EP map and on  
 291 the GP map, the slopes of the target maps are maximally different:  $S_{EPM}^T = (S_{GPM}^T)^{-1}$ . Only the spatial  
 292 component of fine-grainedness (how many “points” in the evolving maps are selectable, see SI1) is  
 293 considered for this experiment. For instance, the white asterisk represents a population in which the fitness is  
 294 calculated taking into account four points of the EPM and eight points of the GPM (in both cases, in each  
 295 generation the these points are randomly selected from a set of 10). Colours represent the ED-based  
 296 similarity of the general phenotypic distribution (GPD) to the targets after  $t=10^4$  generations  
 297  $ED(GPD, GPM_T) - ED(GPD, EPM_T)$ . Basically, yellowish colour indicates that trait covariation found in the  
 298 GPD closely resembles that of the  $S_{EPM}^T$ , and bluish colour that of the  $S_{GPM}^T$ . The resulting heatmap shows  
 299 that the structure of the GPD is determined by the map under more fine-grained selection. The pattern is  
 300 most clear when selection on one of the maps is very fine-grained (off-diagonal dashed lines) and in the  
 301 other map is very coarse-grained. When the selective grain of the two maps is comparable, or when the  
 302 selection on a map is not very fine-grained, intermediate maps not attributable to any target are found. (B) As  
 303 in (A) but using non-linear targets (a random polynomial function with  $deg(f) > 2$ ). As Fig. 5 shows, the  
 304 ability of the developmental systems to evolve non-linear maps is severely limited, so here most of the  
 305 evolved maps are different from both targets (if the target map is too non-linear, nor the genotype nor the  
 306 environment can be the leaders of adaptive change).  $n=30$  replicates,  $p=64$  individuals, GRN + multilinear  
 307 model.

308

309

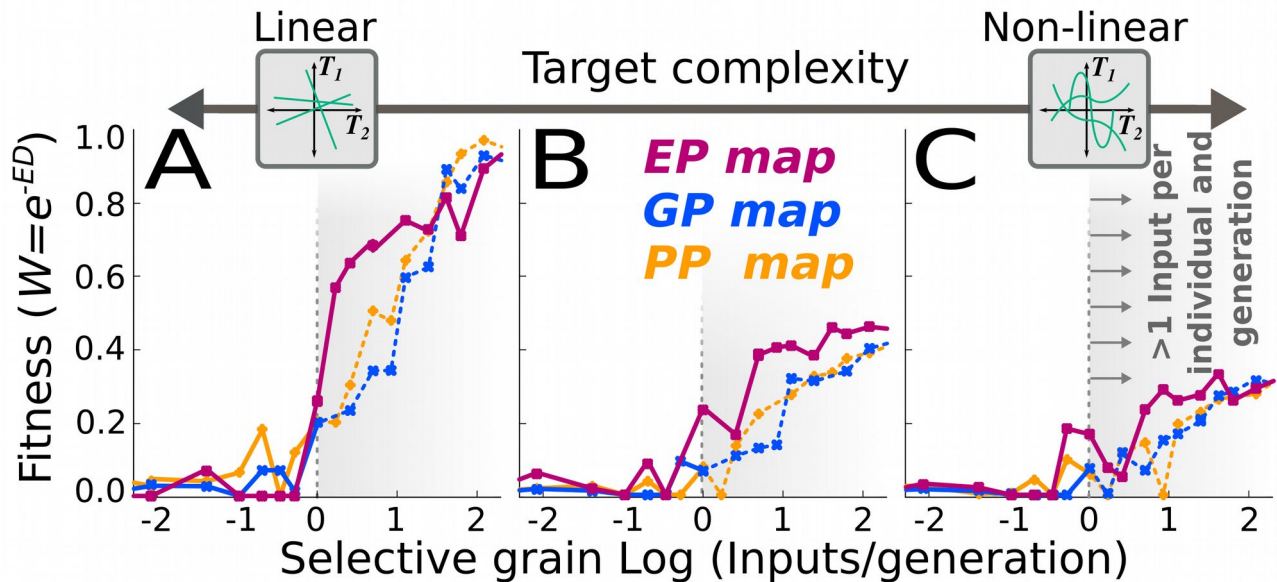

312 **Fig. S8. Simpler maps evolve more easily than complex ones.** As in Fig. 5, this figure shows the efficiency  
 313 of natural selection in evolving certain maps (fitness achieved, vertical axis) under different regimes of  
 314 selective grain (the average number of parameter-phenotype points that can be “seen” by natural selection in  
 315 each generation, horizontal axis). In this experiment, however, we use also different non-linear functions  
 316 (random polynomials) as targets maps. (A) shows the same result shown in Fig. 5: Linear maps can be easily  
 317 evolved given certain degree of selective grain. (B-C) generalise this result to non-linear target functions:  
 318 complex maps are hard to evolve even under fine-grained selection regimes. This suggests that the adaptive  
 319 evolution of very complex maps would require biologically unrealistic levels of selective grain (although  
 320 they could be attained by means of non-adaptive mechanisms, see main text). For a given target complexity,  
 321 specially for simpler ones, maximal efficiency is generally achieved when single individuals can experience  
 322 more than one input per generation ( $\text{Log}(\text{Input}/\text{Generation}) > 0$ , shadowy areas). Biologically, these high levels of  
 323 selection fine-grainedness can only be achieved by the Environment-to-Phenotype (EP) map (see main text  
 324 and Fig. 5). For the sake of clarity, only averages over the  $n=30$  replicates are shown (points), and Log-scale  
 325 is used in the horizontal axis. Euclidean-distance (ED)-based fitness.  $p=64$  individuals;  $t=10^4$  generations,  
 326 GRN + Multilinear model. For each replicate, the target map is a polynomial function of known degree  
 327 (complexity) and arbitrary non-zero coefficients.
